# Supplementary material for: Exposure to Molybdate Results in Metabolic Disorder: An Integrated Study of the Urine Elementome and Serum Metabolome in Mice
Source: MDPI journal article supplement (doi:10.3390/toxics12040288), 2024-04-14
Supplement: s1 [file s1]

## Supplemental materials

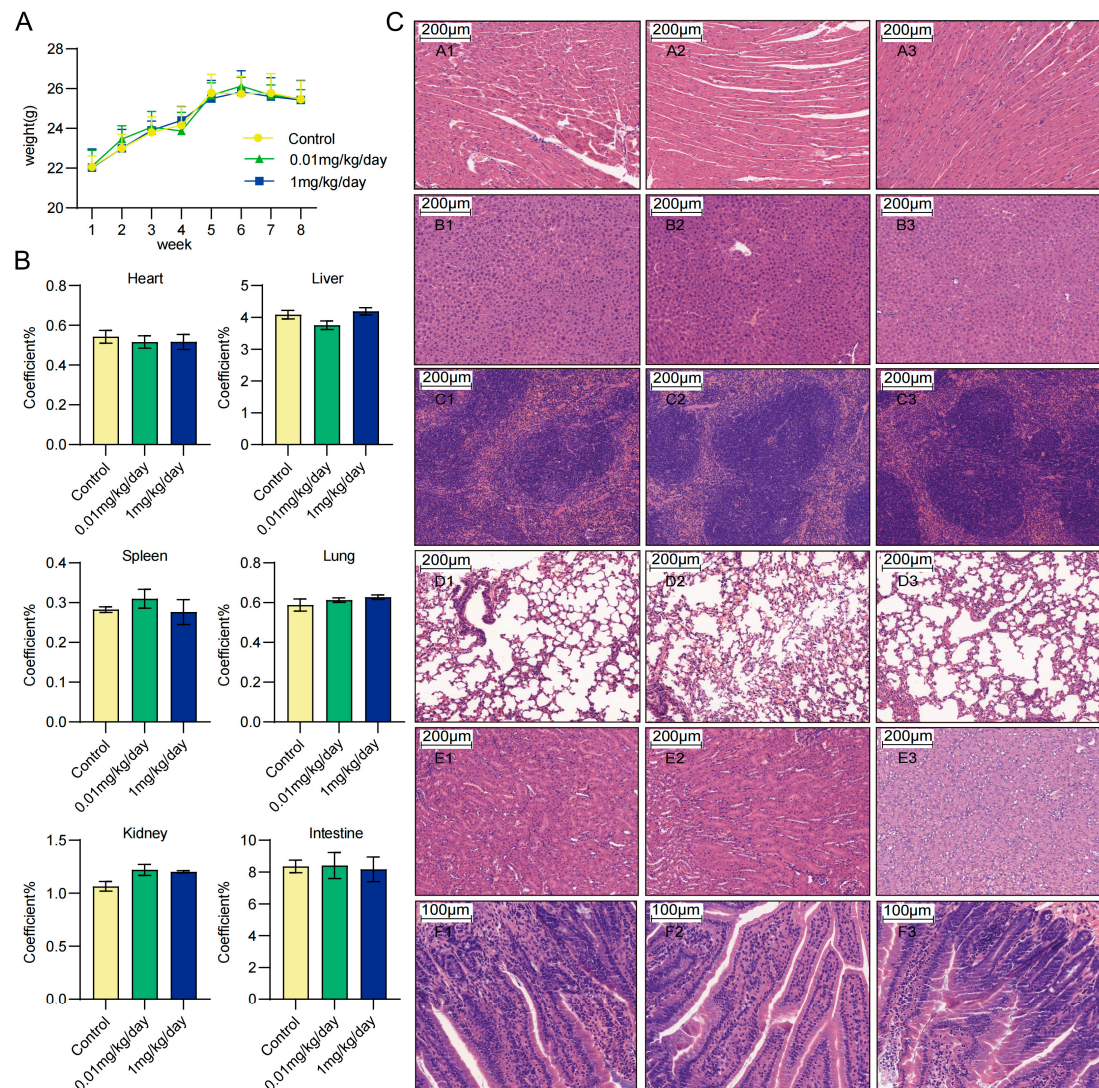

**Figure S1.** General toxicity of molybdenum exposure *in vivo*. **(A)** Line chart depicting the changes in body weight during molybdenum treatment. **(B)** Histogram illustrating the organ coefficients of the heart, liver, spleen, lung, kidney, and intestine. **(C)** Representative pathological images of the major organs. Figures labeled A to F represent the heart, liver, spleen, lung, kidney, and intestine, respectively. Figures labeled 1 to 3 represent the control group, molybdenum-0.01 mg/kg/day group, and molybdenum-1 mg/kg/day group, respectively. Organ coefficient = weight of the organ (g)/total body weight (g) ×100.

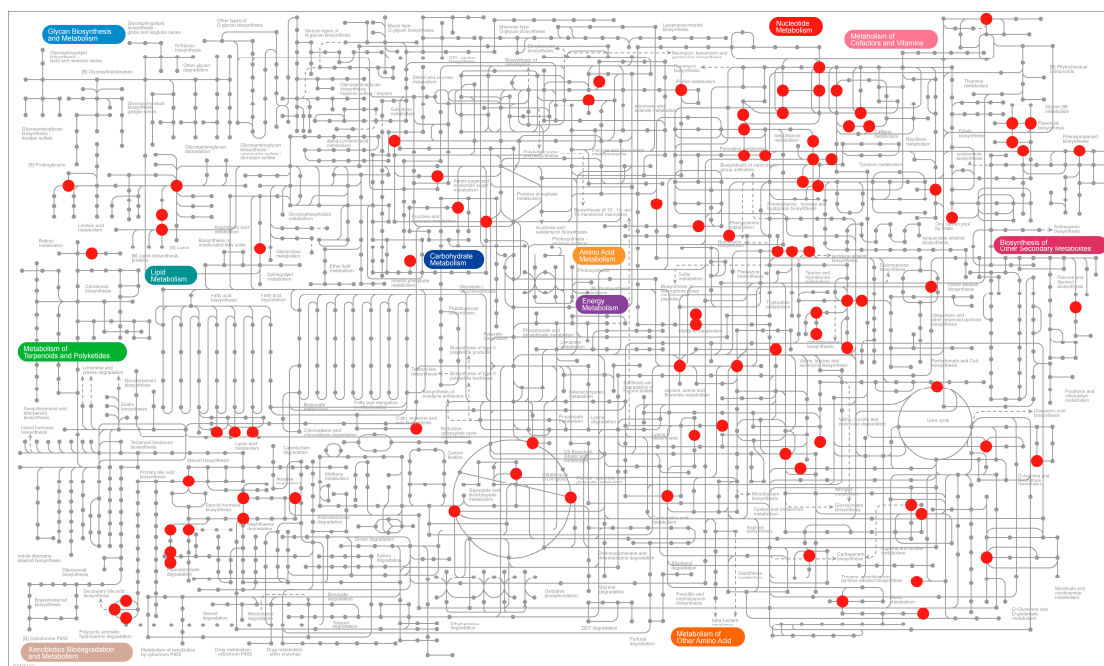

**Figure S2.** Detected metabolites in the general metabolic pathway based on iPath 3.0 [https://pathways.embl.de (accessed on 21 December 2023)]. The red dot indicates the detected metabolites in serum. The pathway and metabolite information can be found in detail in Metabolism module of Available maps [https://pathways.embl.de/ipath3.cgi?map=metabolic (accessed on 21 December 2023)].

**Table S1.** Participant characteristics.

|                          |                                        | Total Subjects<br>N (%) or Mean (SD) |
|--------------------------|----------------------------------------|--------------------------------------|
| N                        |                                        | 838                                  |
| Age (Years)              |                                        | 52.14 (17.81)                        |
| Race                     |                                        |                                      |
|                          | Mexican American                       | 116 (13.8)                           |
|                          | Other Hispanic                         | 70 (8.4)                             |
|                          | Non-Hispanic White                     | 288 (34.4)                           |
|                          | Non-Hispanic Black                     | 200 (23.9)                           |
|                          | Non-Hispanic Asian                     | 113 (13.5)                           |
|                          | Other Race - Including Multi-Racial    | 51 (6.0)                             |
| Education                |                                        |                                      |
|                          | High school and below                  | 185 (22.1)                           |
|                          | High school graduate/GED or equivalent | 219 (26.1)                           |
|                          | Some college or AA degree              | 235 (28.0)                           |
|                          | College graduate or above              | 198 (23.6)                           |
|                          | Missing                                | 1 (0.1)                              |
| Smoking status           |                                        |                                      |
|                          | Never smoker                           | 396 (47.3)                           |
|                          | Former smoker                          | 270 (32.2)                           |
|                          | Current smoker                         | 172 (20.5)                           |
| BMI (kg/m <sup>2</sup> ) |                                        |                                      |
|                          | Underweight                            | 12 (1.4)                             |
|                          | Normal weight                          | 194 (23.2)                           |
|                          | Overweight                             | 297 (35.4)                           |
|                          | Obesity                                | 320 (38.2)                           |
|                          | Missing                                | 15 (1.8)                             |
| Cadmium (µg/L)           |                                        | 0.34 (0.46)                          |
| Molybdenum (µg/L)        |                                        | 53.40 (51.70)                        |

BMI, body mass index.

AA degree, an associate's degree.
